# Supplementary material for: Peeling the astronomical onion
Source: Royal Society of Chemistry journal article supplement (doi:10.1039/c6cp05751a), 2016-01-01
Supplement: c6cp05751a1.pdf [file c6cp05751a1.pdf]

## Peeling the Astronomical Onion

### Supplementary Information

Alexander Rosu-Finsen<sup>a</sup>, Demian Marchione<sup>a,†</sup>, Tara L. Salter<sup>b</sup>, James W. Stubbing<sup>b</sup>, Wendy A. Brown<sup>b</sup> and Martin R.S. McCoustra<sup>a</sup>

Experiments regarding re-adsorption of H<sub>2</sub>O after the initial exposure of H<sub>2</sub>O are explained here as conducted at HWU where 0.5 ML H<sub>2</sub>O films were investigated on aSiO<sub>2</sub>. The re-adsorption experiments involved reflection-absorption infrared spectroscopy (RAIRS) and temperature programmed desorption with the results shown in Fig. 1.

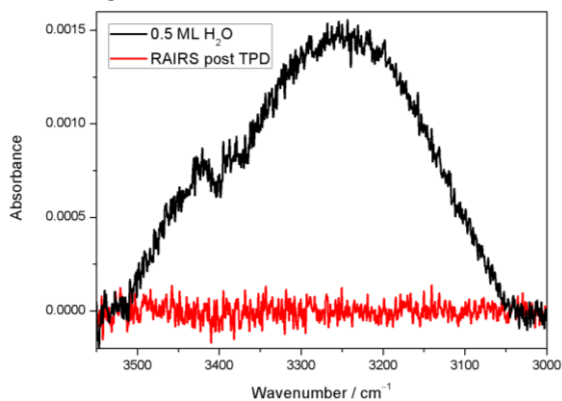

**Figure 1:** What is shown here is 0.5 ML H<sub>2</sub>O on aSiO<sub>2</sub> at 17 K (black trace) which is later desorbed leading to the red trace showing no signs of re-adsorbed H<sub>2</sub>O. Figure also found in reference [1].

A 0.5 ML H<sub>2</sub>O film was deposited onto the aSiO<sub>2</sub> surface at 17 K followed by the collection of a RAIR spectrum as shown with the black trace in Fig. 1. The film was then desorbed with a heating rate of 0.04 K s<sup>-1</sup> and the surface was held at >170 K until a partial pressure of  $2 \times 10^{-10}$  mbar of H<sub>2</sub>O was monitored with the mass spectrometer (this is the same partial pressure range the de-wetting experiments were conducted at). The sample was allowed to cool to the base temperature of 17 K over the timescale of a typical experiment and a secondary RAIR spectrum was collected as shown with the red trace in Fig. 1. As can be seen, the red trace shows negligible amounts of H<sub>2</sub>O indicating that re-adsorption does not occur once the initial low coverage H<sub>2</sub>O film has been deposited onto the surface.

#### References:

- 1 A. Rosu-Finsen, Ph.D. Thesis, Heriot-Watt University, 2016.

<sup>a</sup> Institute of Chemical Sciences, Heriot-Watt University, EDINBURGH, EH14 4AS, United Kingdom.

<sup>b</sup> Division of Chemistry, University of Sussex, Falmer, BRIGHTON, BN1 9QJ, United Kingdom.

<sup>c</sup> † Current Address: Science Division, Jet Propulsion Laboratory, California Institute of Technology, Pasadena, CA 91109, USA.

Electronic Supplementary Information (ESI) available: [details of any supplementary information available should be included here]. See DOI: 10.1039/x0xx00000x
